# Supplementary material
Source: Royal Society of Chemistry journal article supplement (doi:10.1039/d6ta02247b)
Supplement: d6ta02247b1.pdf [file d6ta02247b1.pdf]

## **ELECTRONIC SUPPLEMENTARY INFORMATION**

### **Probing electrochemical phenomena in commercial pouch cells using a multimodal magnetic resonance approach**

Konstantin Romanenko,<sup>\*a</sup> Nikolai I. Avdievich<sup>b</sup>

<sup>a</sup> Université Paris-Saclay, CEA, CNRS, NIMBE, Gif-sur-Yvette, 91191, France

Email: konstantin.romanenko@cea.fr

<sup>b</sup> Max-Planck Institute for Biological Cybernetics, Tübingen, 72076, Germany

## S1. NMR lineshape analysis

Our model is based on a qualitative lineshape assessment leading to the following empirical assumptions sufficient to describe experimental *plug-and-play*  ${}^7\text{Li}$  NMR spectra in the SoC range from 20 to 100%:

A. Up to three distinct Li-ion environments can co-exist in the LCO cathode, giving rise to three resolved Lorentzian lines.

B. At least three distinct Li-ion environments can co-exist in the anode ( $\text{Li}_x\text{C}_6$ ), giving rise to three first-order quadrupolar triplets.

C. One Li-ion environment exists in the electrolyte.

Here, we use the following spin-system indexing convention: in the cathode,  $s = 1, 2, 3$  correspond to three singlets; in the anode,  $s = 4, 5, 6$  correspond to three quadrupolar triplets; in the electrolyte,  $s = 7$  corresponds to a singlet. Thus, in total, we have seven spin systems (indices  $s = 1 - 7$ ), contributing to the NMR spectrum:

$$S = \sum_s F_s \quad (\text{S1})$$

Multiparametric line-shape decomposition is performed with a set of Lorentzian multiplet functions  $F_k$  of the NMR frequency:

$$F_k(\omega) = \sum_k A_k (1 + (\omega - \omega_k)^2 R_k^2)^{-1}, \quad (\text{S2})$$

where  $A_k$ ,  $\omega_k$  (Hz), and  $R_k$  are the magnitude, frequency, and reciprocal half-width-at-half - maximum (RHWHM) of a peak, respectively. The multiplicity (singlet or triplet) and frequencies of individual lines,  $\omega_L$ , are determined by the residual quadrupolar couplings (RQCs):

$$\omega_L = \Omega + L Q, \quad (\text{S3})$$

where  $\Omega$  is the central frequency of the multiplet,  $Q$  is the first-order quadrupolar frequency shift, and  $L$  takes values of 0, and  $\pm 1$ . In accordance with assumptions (A-C),  $Q = 0$  for spin systems 1, 2, 3, 7. Integrated intensities ( $I_L$ ) of a 3/2-spin spectrum satisfy the multiplicity rule (3:4:3) and the multiplet is symmetrical with respect to  $\Omega$ .

$$A_1 = A_{-1}, \quad (\text{S4})$$

$$R_1 = R_{-1}, \quad (\text{S5})$$

The experimental spectrum is normalized

$$S(\omega) \rightarrow S(\omega) / \Sigma_{\omega} S(\omega), \quad (\text{S6})$$

so that:

$$\Sigma_{\omega} S(\omega) = 1, \quad (\text{S7})$$

which also implies that

$$\Sigma_L I_L = 1. \quad (\text{S8})$$

The NMR spectra are modeled by ten Lorentzian lines described by a total of 30 parameters ( $P$ ): peak frequencies ( $\omega$ ), peak intensities ( $A$ ) and relaxation time constants ( $R$ ).

To improve the quality of data fitting, we restrict each parameter  $P_j$  within specific cutoff limits ( $T_{1j}$ ,  $T_{2j}$ ) via an asymptotic function of the following shape:

$$P_j = (T_{1j}-T_{2j}) \arctan(t)/\pi + 0.5(T_{1j}+T_{2j}), \quad (\text{S9})$$

where  $t$  is a free parameter. The parameter cutoffs ( $T_{1j} - T_{2j}$ ) are selected based on peak positions, intensities and linewidths of well-resolved  ${}^7\text{Li}$  NMR signals (*e.g.*, Fig.5). For example, for  $A_k$ ,  $\omega_k$ , and  $R_k$  parameters of signals visible in Fig.5b (SoC > 30%), the  $T_1$  and  $T_2$  limits can be established within narrow margins leading to high accuracy of the fit.

## S2. Battery Cells

Table S1

|                |                       |
|----------------|-----------------------|
| Cell model     | OnePlus7 <sup>1</sup> |
| Cathode        | LCO                   |
| Anode          | G                     |
| Size (mm)      | 73×59×5               |
| $C$ (Ah)       | 3.6                   |
| $V_{\min}$ (V) | 2.75                  |
| $V_{\max}$ (V) | 4.4                   |

LCO – Lithium Cobalt Oxide;  $C$  – nominal cell capacity;  $V_{\min}$ ,  $V_{\max}$  – voltage cutoff limits; G – graphite.

<sup>1</sup> OnePlus Technology (Shenzhen) Co., Ltd. Shenzhen (China)
